# Supplementary material for: The TROP2 targeting antibody-drug conjugate IMMU-132 enhances the efficacy of radiation therapy for lung cancer
Source: Research Square preprint supplement (doi:10.21203/rs.3.rs-7593735/v1), 2025-09-23
Supplement: Supplementary file 1 [file fe7c135b3d541325b869cd13.docx]

**Supplementary Figure Legends**

**Supplementary Figure 1.** **Cell surface binding of TROP2 and internalization of IMMU-132 in A549 and LLC cells.** Cell surface expression of TROP2 was examined by flow cytometry and internalization by Immunofluorescence. Cells were incubated with TROP2 (Abcam Cat# ab214488, RRID: AB_2811182) for 1h at room temperature, followed by FITC-conjugated secondary antibody and acquired by flow cytometry and fold change of median fluorescent intensity (MFI) of TROP2 expression on A549 (A) and LLC (C) cells of sham and XRT (5Gy), analyzed by FlowJo. TROP2 expression in A549 (B) and LLC (D) in sham and XRT by western blot. Immunofluorescence images of surface TROP2 on A549 (E) and LLC (G) cells in sham and XRT (5Gy). Mean Fluorescent intensity of TROP2 on A549 (F) and LLC (H) cells in sham and XRT. Data was obtained from measuring intensity in 50 cells. Histogram showing A549 (I) and LLC (K) cells incubated with IMMU-132 (1000nM) for 1h at room temperature, followed by PE-conjugated anti-human secondary antibody and acquired by flow cytometry. Bar diagram representing the median fluorescent intensity (MFI) of IMMU-132 on A549 (J) and LLC (L) cells was analyzed by FlowJo. Time-dependent internalization of Fluor 488-labelled IMMU-132 in A549 2h & 24h (M) and LLC cells 2h & 24h (O). The image was taken by a Zeiss fluorescent microscope at 63X. Scale bar represents 20 µM. Mean green fluorescence intensity (Mean GFI) of internalized IMMU-132 in A549 (N) and LLC (P) following 2h and 24h. *P<0.05, **p<0.001, and ***p<0.0001.

**Supplementary Figure 2**. **Dose-dependent cytotoxicity and radiosensitization of IMMU-132 ADC in A549 and LLC cells.** A549 (A) and LLC (F) cells were treated with various doses of (120nm, 30nM, 7.5nM, 1.875nM, and 0.4685nM) IMMU-132 ADC for 48 h followed by Cell Titer Glo Luminescent cell viability assay. Cell viability was normalized to untreated cells (control) and represents the mean with SD from three treatments. The data were fitted using a non-linear fit equation in GraphPad Prism software. The half minimum inhibitory concentration (IC50) is shown in the respective tables. A549 and LLC cells were seeded in 6-well plates in triplicate, followed by treatment with 0nM, 0.2nM, 0.4nM, 0.6nM, 0.8nM, and 1nM of IMMU-132. Cells were given radiation exposure to 0, 1, 3, 5, and 7 Gy. Colonies were stained with crystal violet, and colonies comprising 50 cells or more were counted using a microscope. Clonogenic survival of A549 (B) and LLC (G) cells at 7 days following exposure to IMMU-132 ADC and/or XRT of different doses. Synergy plots demonstrate additive (green) or synergy (blue) for the combination of IMMU-132 with IR in A549 (C) and LLC (H) cells. **(D and I)** H441 (D) and H460 (I) cells showing the effective dose (EC50) of IMMU-132. **(E and J)** H441(E) and H460 (J) showing the effective dose (EC50) of radiation therapy. Synergy plots and EC50 were estimated by Combenefit software.

**Supplementary Figure 3. IMMU-132 blocks cells in the G2/M phase in NSCLC cells.** A549 and LLC cells were treated with one and 5nM of IMMU-132 24 h before XRT (2Gy), and the cell cycle profile was analyzed after 1h of irradiation (2Gy). 0 represents untreated. Cell cycle analysis was performed using PI staining and analyzed by flow cytometry. Flow cytometry analysis showing the gating pattern of the percentage of G0, G1, S, and G2 phases in untreated, XRT, IMMU-132, and IMMU-132+XRT-treated A549 cells (A) and in LLC cells (B). Bar diagram showing percentage of A549 cells (C) and LLC (D) in G0, G1, S, and G2 phase for untreated, XRT, IMMU-132, and IMMU-132+XRT.

**Supplementary Figure 4. IMMU-132 induces apoptosis in A549 and LLC cells following XRT.** A549 and LLC cells were treated with 1nM and 5nM of IMMU-132 24h before XRT (2Gy and 5Gy), and apoptotic cells were analyzed after 24h following XRT. 0 represents no IMMU-132 treatment. Flow cytometry analysis of apoptosis using annexin V/PI-stained A549 cells (A) and LLC cells (D). Bar diagrams display the percentage of early apoptotic (annexin V-positive and PI-negative) A549 (B) and LLC cells (E), as well as late apoptotic (double-positive) A549 (C) and LLC cells (F). *p<0.05, **p<0.01, ***p≥0.001 and ****p<0.0001

**Supplementary Figure 6.** **Treatment schedule of H441 and H460 lung tumor xenografts and efficacy of IMMU-132 in immunocompetent syngeneic mice bearing subcutaneous lung tumors.** Treatment schedule for H441 (A) and H460 (B) lung tumor xenografts in nude mice. Nude mice were injected subcutaneously with H441 and H460 cells into the hind limb, followed by treatment with IMMU-132 and XRT. IMMU-132 (25mg/kg) was injected into nude mice of H441 xenograft on days 16 and 26, and 6 days and 13 days (2 cycles) in H460 xenograft nude mice through I.P. Six doses of 2 Gy of local XRT were administered in the H441 xenograft (16-18 days & 26-28 days), and ten doses of 3 Gy of local RT were administered in H460 tumor on days 6 to 10 and 13 to 17. The body weight of H441 (C) and H460 (D) tumor-bearing mice in IMMU-132 XRT, IMMU-132 XRT alone, and the Untreated group (n=5-8 mice). (E) Treatment schedule for LLC subcutaneous tumor in C57BL/6 mice. Mean tumor growth curves (F), survival curve (G), and body weight (H) of LLC tumor for untreated, IMMU-132 alone, XRT, and IMMU-132+XRT treated animals (n=5 mice).
